# Supplementary material for: Three-Dimensional Biofabrication Models of Endometriosis and the Endometriotic Microenvironment
Source: Preprints.org preprint supplement (doi:10.20944/preprints202010.0228.v1), 2020-10-12
Supplement: Supplementary file 1 [file supplementary]

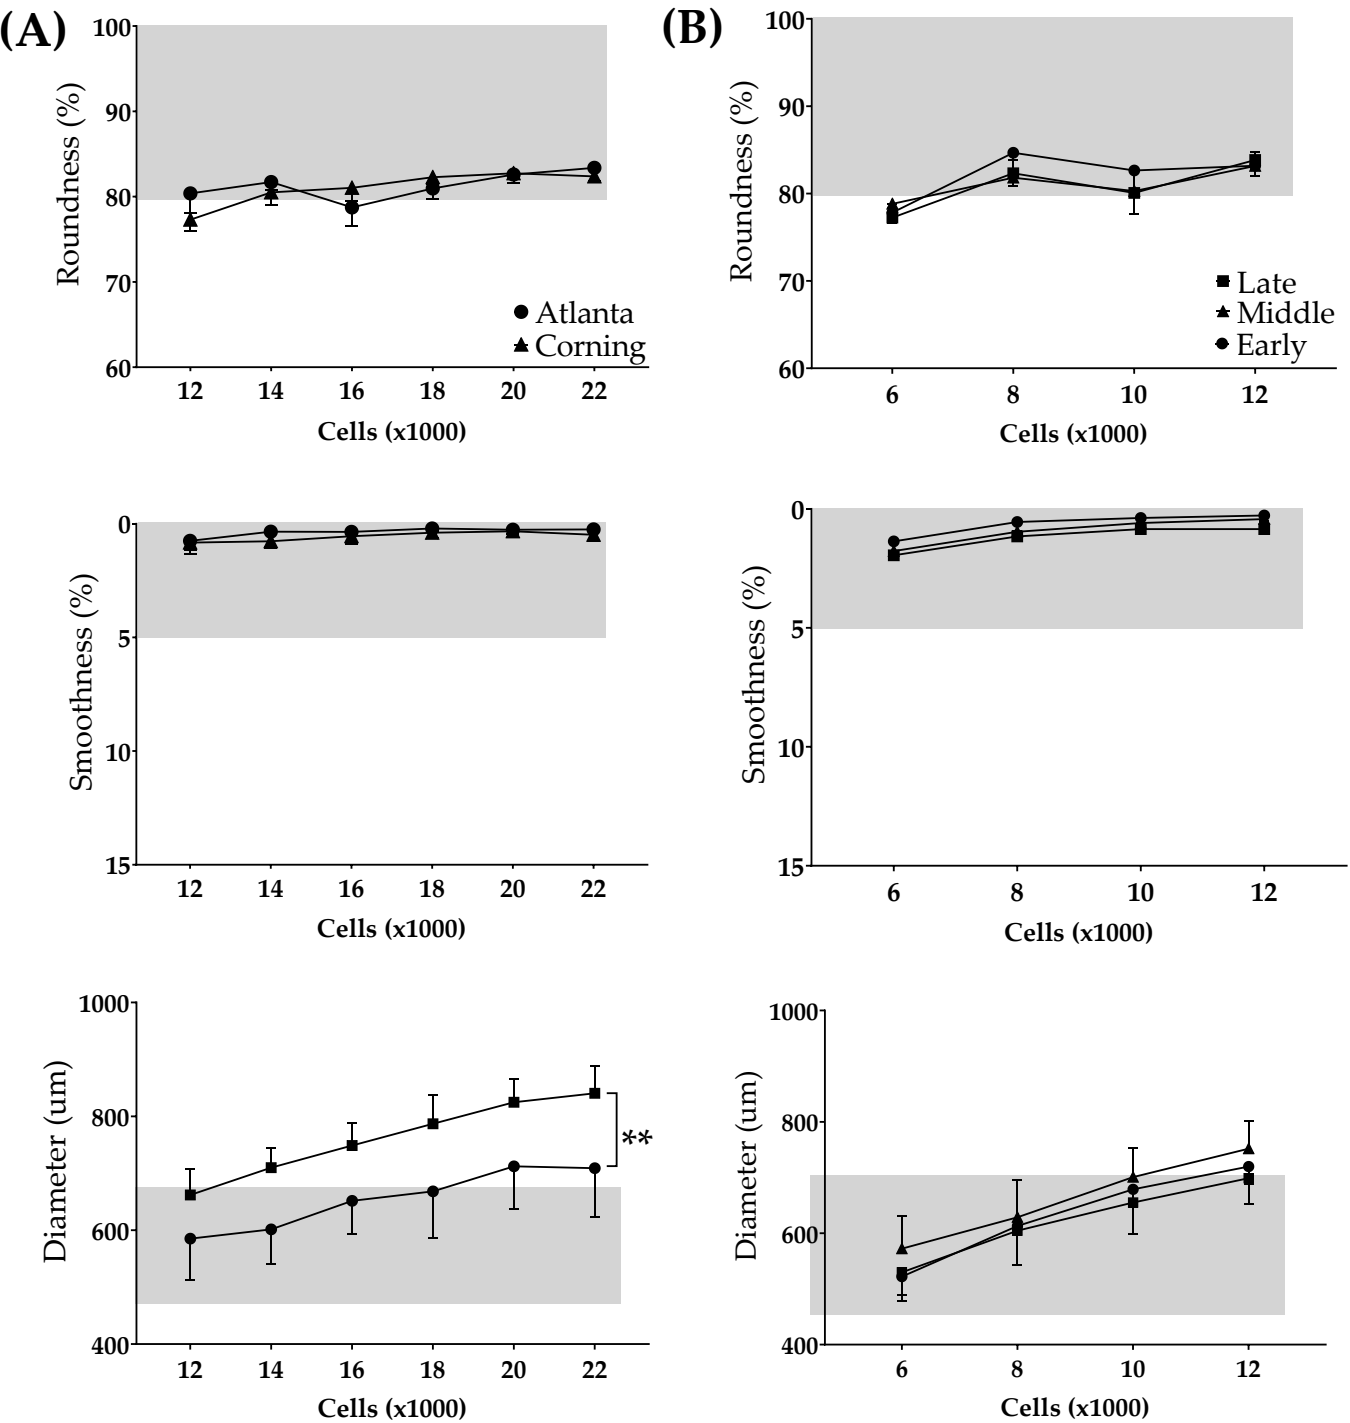

**Supplemental Figure S1. 12Z cell spheroid size was sensitive to changes in serum. A)** At 72 hours, 12Z spheroids showed no differences in roundness or smoothness. However, 12Z spheroids were significantly larger when grown in serum from Atlanta Biologicals than Corning. **B)** At 72 hours, spheroids have no statistically significant differences in roundness, smoothness, or diameter as passage number increases. Early passage was < +5, middle = +5-+15, and late < +15. N = 3. \*\*, P < 0.01.

**(A)**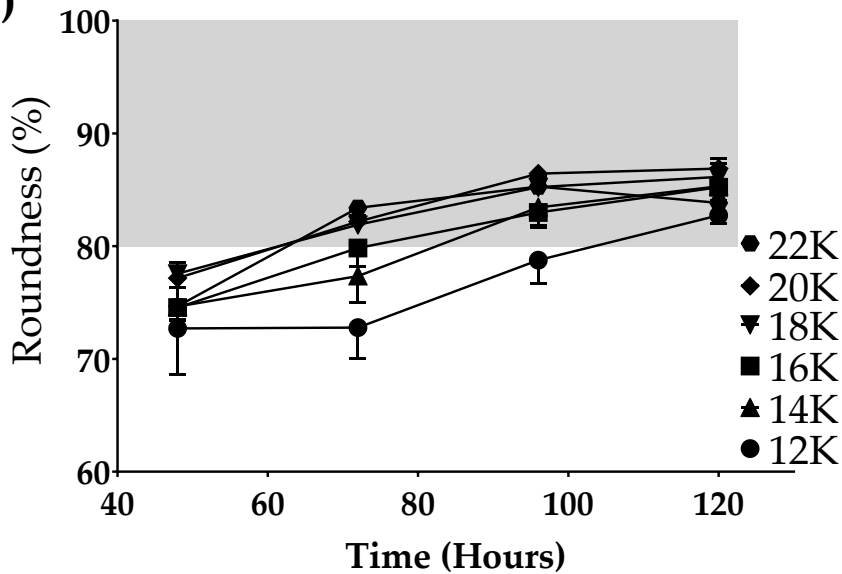

**Supplemental Figure S2. HEYA8 spheroid characteristics.**

Optimization for time post-seeding and number of cells seeded for A) roundness, B) smoothness, and C) diameter. Grey shading indicates tolerability range of Regenova technology. N = 3.

**(B)**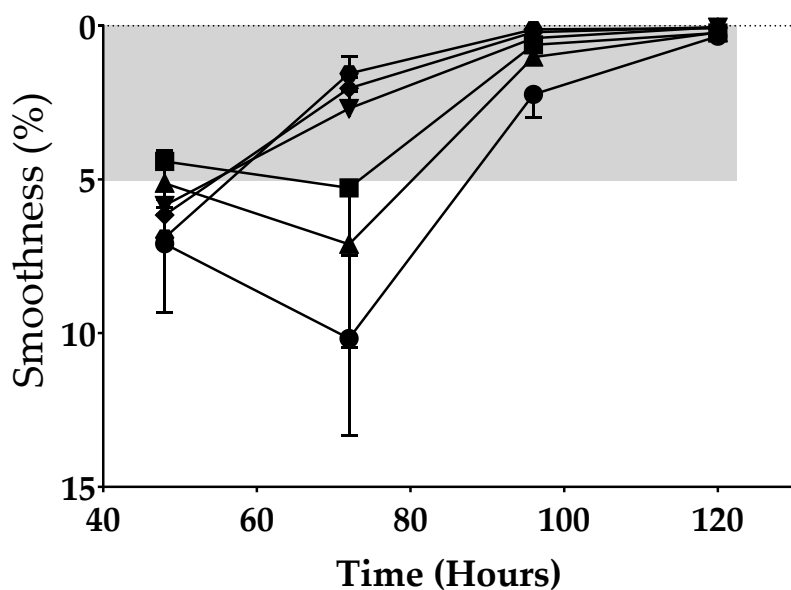**(C)**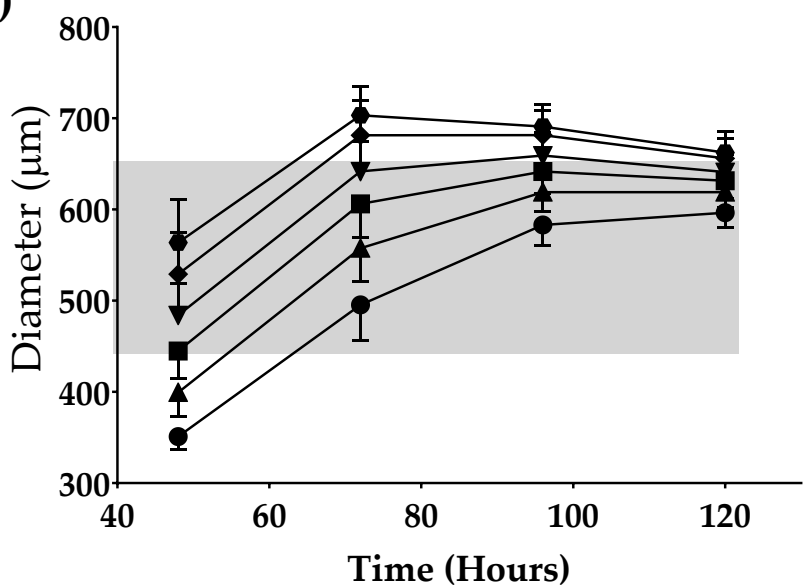

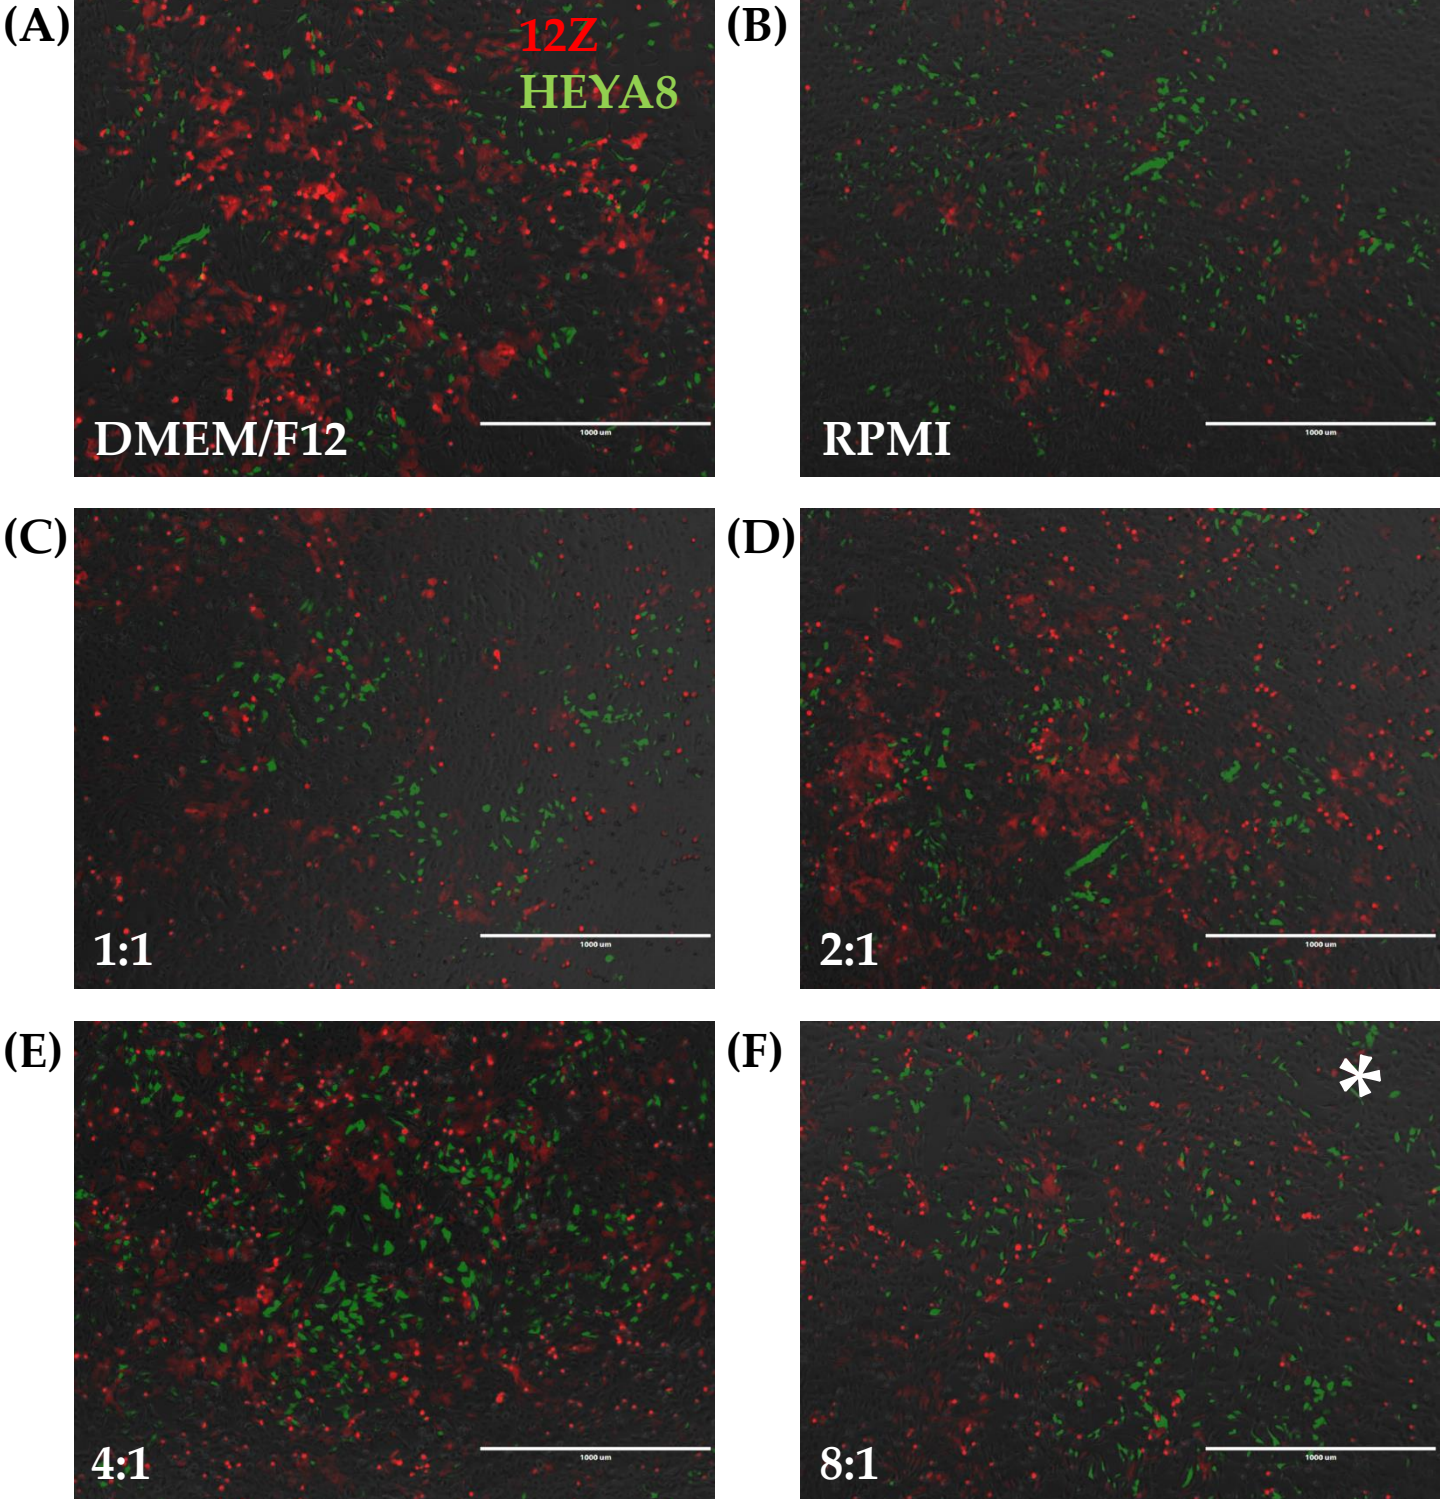

**Supplemental Figure S3. Co-culturing cells in monolayer to determine optimal media.** Cells were cultured for 96 hours in a 6-well plate with a total of 100,000 cells at a 7-12Z:1-HEYA8 ratio. Media used was **A)** DMEM/F12, **B)** RPMI, **C)** 1-DMEM/F12:1-RPMI, **D)** 2-DMEM/F12:1-RPMI, **E)** 4-DMEM/F12:1-RPMI, or **F)** 8-DMEM/F12:1-RPMI. Scale = 1000  $\mu\text{m}$ . \* Indicates media that appropriately supports growth of both cell lines in co-culture.

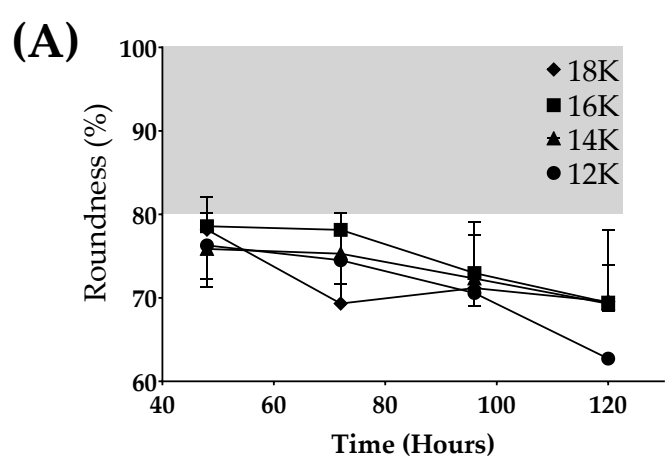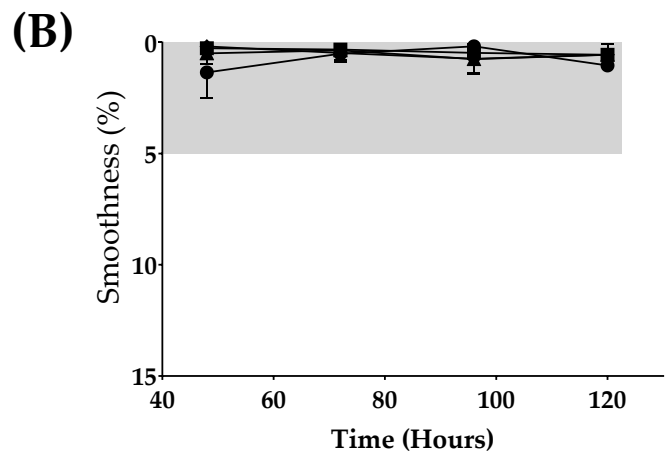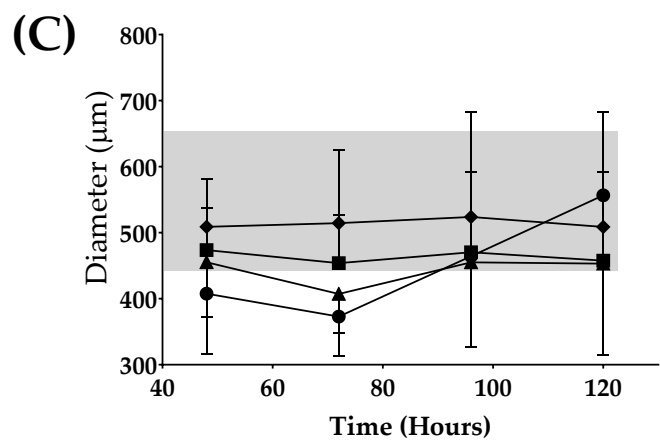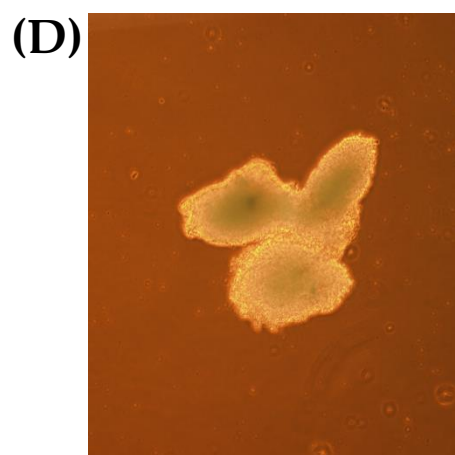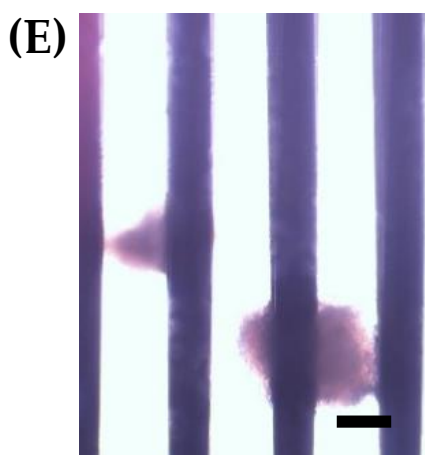

**Supplemental Figure S4. T-HESC cells formed spheroids but failed to meet all of the Regenova Bio 3D Printer criteria for biofabrication.** Optimization for time post-seeding and number of cells seeded for **A)** roundness, **B)** smoothness, and **C)** diameter. Grey shading indicates tolerability range of Regenova technology. N= 3. **D)** Spheroids made from T-HESC cells alone become misshapen from the suction or **E)** shear on contact with the Kenzan. Scale = 200  $\mu\text{m}$ .
